# Supplementary material for: Marine Carbohydrates in Arctic Aerosol Particles and Fog – Diversity of Oceanic Sources and Atmospheric Transformations
Source: Copernicus journal article supplement (doi:10.5194/egusphere-2023-1607), 2023-07-25
Supplement: Supplementary file 1 [file egusphere-2023-1607-supplement.pdf]

*Supplement of*

**Marine Carbohydrates in Arctic Aerosol Particles and Fog – Diversity of Oceanic Sources and Atmospheric Transformations**

**Sebastian Zeppenfeld et al.**

*Correspondence to:* Hartmut Herrmann (herrmann@tropos.de)

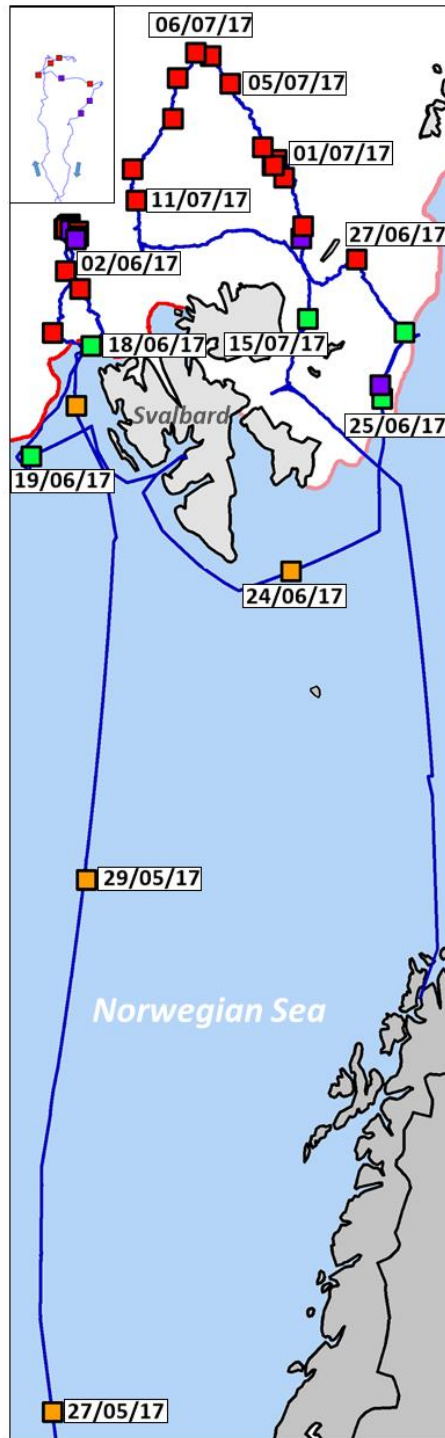

**Figure SI 1.** Cruise track during PS106 (blue) with a closer zoom for the ice floe camp period (5–14 June 2017). Squares represent surface water sampling events (orange: ice-free ocean; red: open leads and polynyas within the pack ice; purple: melt ponds; green: MIZ) The red lines represent the ice edges on 07 June 2017 (west of Svalbard) and 07 July 2017 (east of Svalbard).

**Table SI 1.** Detailed information about size-resolved aerosol particle sampling during PS106 campaign.

| Start sampling <sup>a</sup> | Stop sampling <sup>a</sup> | Location                                                                | Residence time of air masses 12 h before sampling <sup>b</sup> |         |              |          | Wind speed (m s <sup>-1</sup> ) <sup>c</sup> | Air temperature (°C) <sup>c</sup> | Relative humidity (%) <sup>c</sup> | Percentage frequency of occurrence of fog <sup>c,d</sup> (%) | Na <sup>+</sup> <sub>aer,PM10</sub> (ng m <sup>-3</sup> ) <sup>e</sup> | CCHO <sub>aer,PM10</sub> (ng m <sup>-3</sup> ) <sup>e</sup> | $\frac{Na^+_{aer,PM10}}{CCHO_{aer,PM10}}$ |
|-----------------------------|----------------------------|-------------------------------------------------------------------------|----------------------------------------------------------------|---------|--------------|----------|----------------------------------------------|-----------------------------------|------------------------------------|--------------------------------------------------------------|------------------------------------------------------------------------|-------------------------------------------------------------|-------------------------------------------|
|                             |                            |                                                                         | Ice-free (%)                                                   | MIZ (%) | Pack ice (%) | Land (%) |                                              |                                   |                                    |                                                              |                                                                        |                                                             |                                           |
| 24/05/17 20:49              | 26/05/17 16:34             | North Sea                                                               | 100                                                            | 0       | 0            | 0        | 7.0±2.4                                      | 10.5±0.4                          | 97±3                               | 14.9                                                         | 463                                                                    | 4.42                                                        | 9.6E-03                                   |
| 26/05/17 19:34              | 29/05/17 11:33             | Norwegian Sea                                                           | 100                                                            | 0       | 0            | 0        | 9.1±2.3                                      | 5.4±3.3                           | 83±18                              | 35.0                                                         | 765                                                                    | 3.15                                                        | 4.1E-03                                   |
| 29/05/17 12:46              | 01/06/17 08:28             | Greenland Sea/<br>Fram Strait                                           | 50                                                             | 9       | 29           | 13       | 9.9±3.8                                      | -0.1±3.7                          | 77±15                              | 0.0                                                          | 651                                                                    | 1.60                                                        | 2.5E-03                                   |
| 01/06/17 09:35              | 04/06/17 08:06             | Fram Strait/<br>Arctic Ocean<br>(west and<br>northwest of<br>Svalbard)  | 3                                                              | 20      | 76           | 0        | 7.2±3.0                                      | -2.7±1.1                          | 94±4                               | 11.2                                                         | 108                                                                    | 3.22                                                        | 3.0E-02                                   |
| 04/06/17 10:57              | 07/06/17 08:08             |                                                                         | 0                                                              | 1       | 99           | 0        | 5.2±2.1                                      | -3.1±0.8                          | 93±4                               | 2.4                                                          | 37                                                                     | 0.71                                                        | 1.9E-02                                   |
| 07/06/17 09:39              | 10/06/17 08:29             |                                                                         | 0                                                              | 1       | 99           | 0        | 4.5±1.6                                      | -3.1±2.9                          | 95±3                               | 2.1                                                          | 79                                                                     | 3.35                                                        | 4.2E-02                                   |
| 10/06/17 09:25              | 13/06/17 11:23             |                                                                         | 0                                                              | 0       | 100          | 0        | 6.2±3.0                                      | -0.6±0.8                          | 98±5                               | 32.8                                                         | 27                                                                     | 4.66                                                        | 1.7E-01                                   |
| 13/06/17 12:36              | 16/06/17 08:18             |                                                                         | 0                                                              | 0       | 100          | 0        | 4.3±1.5                                      | -1.3±0.7                          | 95±3                               | 8.8                                                          | 12                                                                     | 1.03                                                        | 8.6E-02                                   |
| 16/06/17 09:13              | 19/06/17 09:03             |                                                                         | 2                                                              | 42      | 56           | 0        | 4.0±1.3                                      | -1.2±1.1                          | 89±5                               | 0.4                                                          | 40                                                                     | 2.19                                                        | 5.4E-02                                   |
| 19/06/17 10:00              | 25/06/17 09:30             |                                                                         | Greenland<br>Sea/Barents Sea                                   | 47      | 20           | 11       | 23                                           | 5.5±2.5                           | 1.8±1.9                            | 87±8                                                         | 0.8                                                                    | 230                                                         | 0.66                                      |
| 25/06/17 11:40              | 28/06/17 09:20             | Barents Sea/<br>Arctic Ocean<br>(north and<br>northeast of<br>Svalbard) | 11                                                             | 35      | 54           | 0        | 6.2±2.5                                      | -0.6±0.5                          | 89±5                               | 0.0                                                          | 89                                                                     | 1.19                                                        | 1.3E-02                                   |
| 28/06/17 10:20              | 04/07/17 08:55             |                                                                         | 2                                                              | 5       | 93           | 1        | 6.0±1.7                                      | -1.8±1.5                          | 94±4                               | 4.6                                                          | 40                                                                     | 0.50                                                        | 1.3E-02                                   |
| 04/07/17 10:25              | 07/07/17 08:45             |                                                                         | 0                                                              | 0       | 100          | 0        | 5.9±1.3                                      | -1.5±0.9                          | 98±2                               | 11.5                                                         | 39                                                                     | 1.04                                                        | 2.7E-02                                   |
| 07/07/17 09:50              | 13/07/17 09:00             |                                                                         | 0                                                              | 9       | 87           | 4        | 6.9±2.1                                      | -0.4±0.8                          | 98±2                               | 22.5                                                         | 29                                                                     | 2.83                                                        | 9.8E-02                                   |
| 13/07/17 10:05              | 16/07/17 10:35             |                                                                         | 10                                                             | 42      | 40           | 8        | 7.7±3.5                                      | 0.5±1.1                           | 95±6                               | 8.0                                                          | 269                                                                    | 3.14                                                        | 1.2E-02                                   |

<sup>a</sup> date/time format: dd/mm/yy hh:mm (UTC); <sup>b</sup> residence time of air masses over certain Earth surfaces were calculated based on back-trajectories and sea-ice maps using R; <sup>c</sup> meteorological data (mean ± standard deviation over sampling time) calculated from the quality controlled data archived in the PANGAEA network (Schmithüsen, 2018, 2019); <sup>d</sup> here, fog occurrence was defined based on two operational meteorological thresholds: visibility ≤ 1500 m & relative humidity ≥ 98%; <sup>e</sup> values as the sum of all five Berner stages, size-resolved information are available on PANGAEA.

**Table SI 2.** Fog sampling during the PS106 campaign and average meteorological conditions at the sampling site calculated from the quality controlled data archived in the PANGAEA network (Schmithüsen, 2018, 2019); n.d.=not determined.

| Start sampling <sup>a</sup> | Stop sampling <sup>a</sup> | Location                                                   | Time with fog events <sup>b</sup> (min) | Average wind speed during fog events (m s <sup>-1</sup> ) | Average air temperature during fog events (°C) | pH   | Na <sup>+</sup> <sub>fog,liquid</sub> (mg L <sup>-1</sup> ) | Na <sup>+</sup> <sub>fog,atmos</sub> (ng m <sup>-3</sup> ) | CCHO <sub>fog,liquid</sub> (µg L <sup>-1</sup> ) | CCHO <sub>fog,atmos</sub> (ng m <sup>-3</sup> ) | dFCHO <sub>fog,liquid</sub> (µg L <sup>-1</sup> ) |
|-----------------------------|----------------------------|------------------------------------------------------------|-----------------------------------------|-----------------------------------------------------------|------------------------------------------------|------|-------------------------------------------------------------|------------------------------------------------------------|--------------------------------------------------|-------------------------------------------------|---------------------------------------------------|
| 26/05/17 04:33              | 26/05/17 12:27             | North Sea                                                  | 140                                     | 4.1                                                       | 9.9                                            | n.d. | 91                                                          | 61183                                                      | 1976                                             | 1331.0                                          | 1539.4                                            |
| 26/05/17 18:48              | 27/05/17 12:26             | Norwegian Sea                                              | 1030                                    | 7.9                                                       | 9.1                                            | 5.72 | 61                                                          | n.d.                                                       | 456                                              | n.d.                                            | 416.6                                             |
| 27/05/17 12:46              | 27/05/17 20:39             |                                                            | 240                                     | 8.2                                                       | 9.1                                            | 5.74 | 23                                                          | 22985                                                      | 129                                              | 128.0                                           | 59.5                                              |
| 27/05/17 20:56              | 28/05/17 06:15             |                                                            | 110                                     | 8.4                                                       | 7.8                                            | 6.23 | 13                                                          | 2823                                                       | 153                                              | 32.9                                            | 104.9                                             |
| 01/06/17 13:15              | 02/06/17 16:37             | Fram Strait/Arctic Ocean (west and northwest of Svalbard)  | 480                                     | 8.1                                                       | -1.1                                           | 6.41 | 903                                                         | 150343                                                     | 283                                              | 47.1                                            | 98.3                                              |
| 10/06/17 20:30              | 13/06/17 09:58             |                                                            | 1410                                    | 3.9                                                       | -0.4                                           | 5.85 | 80                                                          | 3723                                                       | 186                                              | 8.7                                             | 104.3                                             |
| 23/06/17 10:00              | 25/06/17 10:10             | Greenland Sea                                              | 30                                      | 4.4                                                       | -1.0                                           | n.d. | 448                                                         | 72589                                                      | 1542                                             | 250.1                                           | 233.5                                             |
| 25/06/17 10:30              | 29/06/17 10:34             | Barents Sea/Arctic Ocean (north and northeast of Svalbard) | 190                                     | 2.9                                                       | 0.0                                            | n.d. | 393                                                         | n.d.                                                       | 726                                              | n.d.                                            | 93.9                                              |
| 29/06/17 10:45              | 01/07/17 10:25             |                                                            | 190                                     | 5.6                                                       | -0.2                                           | n.d. | 374                                                         | 73568                                                      | 21818                                            | 4293.4                                          | 270.5                                             |
| 01/07/17 10:38              | 06/07/17 10:30             |                                                            | 210                                     | 6.7                                                       | -1.5                                           | n.d. | 98                                                          | 3902                                                       | 467                                              | 18.7                                            | 40.4                                              |
| 06/07/17 10:45              | 07/07/17 11:10             |                                                            | 280                                     | 5.6                                                       | -1.2                                           | n.d. | 90                                                          | 7410                                                       | 495                                              | 40.9                                            | 26.2                                              |
| 07/07/17 11:25              | 08/07/17 11:15             |                                                            | 980                                     | 3.8                                                       | -0.4                                           | 6.44 | 30                                                          | 377                                                        | 322                                              | 4.1                                             | 488.0                                             |
| 08/07/17 11:30              | 08/07/17 22:20             |                                                            | 240                                     | 6.8                                                       | -0.5                                           | 6.53 | 13                                                          | 120                                                        | 392                                              | 3.7                                             | 260.8                                             |
| 08/07/17 22:40              | 09/07/17 16:35             |                                                            | 30                                      | 9.2                                                       | -2.9                                           | n.d. | 2.7                                                         | n.d.                                                       | 363                                              | n.d.                                            | 208.2                                             |
| 09/07/17 17:00              | 10/07/17 11:00             |                                                            | 330                                     | 8.1                                                       | -0.6                                           | 6.75 | 5.1                                                         | 185                                                        | 81                                               | 3.0                                             | 84.1                                              |
| 10/07/17 11:15              | 11/07/17 11:00             |                                                            | 250                                     | 9.0                                                       | 0.0                                            | 6.26 | 19                                                          | 1164                                                       | 336                                              | 20.1                                            | 61.3                                              |

|                |                |                                                                        |     |      |      |      |     |      |     |      |       |
|----------------|----------------|------------------------------------------------------------------------|-----|------|------|------|-----|------|-----|------|-------|
| 11/07/17 11:15 | 14/07/17 10:25 | Barents<br>Sea/Arctic<br>Ocean (north<br>and northeast<br>of Svalbard) | 200 | 7.3  | -0.5 | 6.08 | 5.1 | 392  | 66  | 5.1  | 19.5  |
| 14/07/17 10:38 | 15/07/17 10:45 |                                                                        | 10  | 13.5 | -0.1 | 6.12 | 7.6 | 2196 | 67  | 19.3 | 13.6  |
| 15/07/17 10:52 | 16/07/17 10:20 |                                                                        | 230 | 4.4  | -0.2 | 6.14 | 18  | 3213 | 64  | 11.5 | 11.1  |
| 16/07/17 10:30 | 16/07/17 22:15 |                                                                        | 100 | 7.1  | 1.2  | 6.18 | 1.7 | n.d  | 18  | n.d  | 2.7   |
| 16/07/17 22:30 | 17/07/17 10:20 |                                                                        | 220 | 9.8  | 1.6  | 6.02 | 59  | n.d  | 103 | n.d  | 23.3  |
| 17/07/17 10:30 | 17/07/17 14:00 |                                                                        | 210 | 8.5  | 1.4  | 5.68 | 101 | n.d  | 321 | n.d  | 170.8 |

<sup>a</sup> date/time format: dd/mm/yy hh:mm (UTC). <sup>b</sup> here, fog occurrence was defined based on two operational meteorological thresholds: visibility $\leq$ 1500 m & relative humidity  $\geq$ 98%.

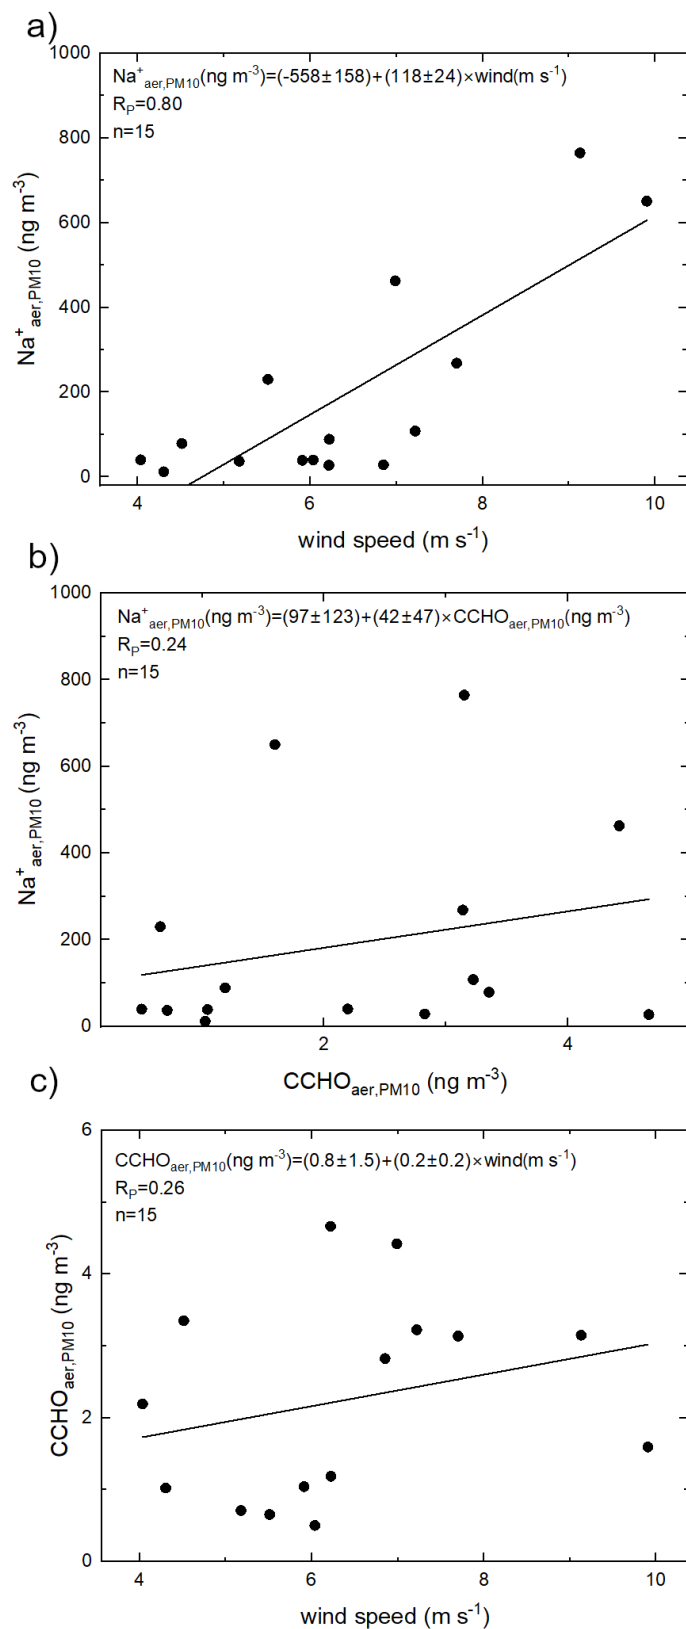

**Figure SI 2.** Correlations between a)  $\text{Na}^+_{\text{aer,PM10}}$  and the averaged wind speed, b)  $\text{Na}^+_{\text{aer,PM10}}$  and  $\text{CCHO}_{\text{aer,PM10}}$ , c)  $\text{CCHO}_{\text{aer,PM10}}$  and averaged wind speed.

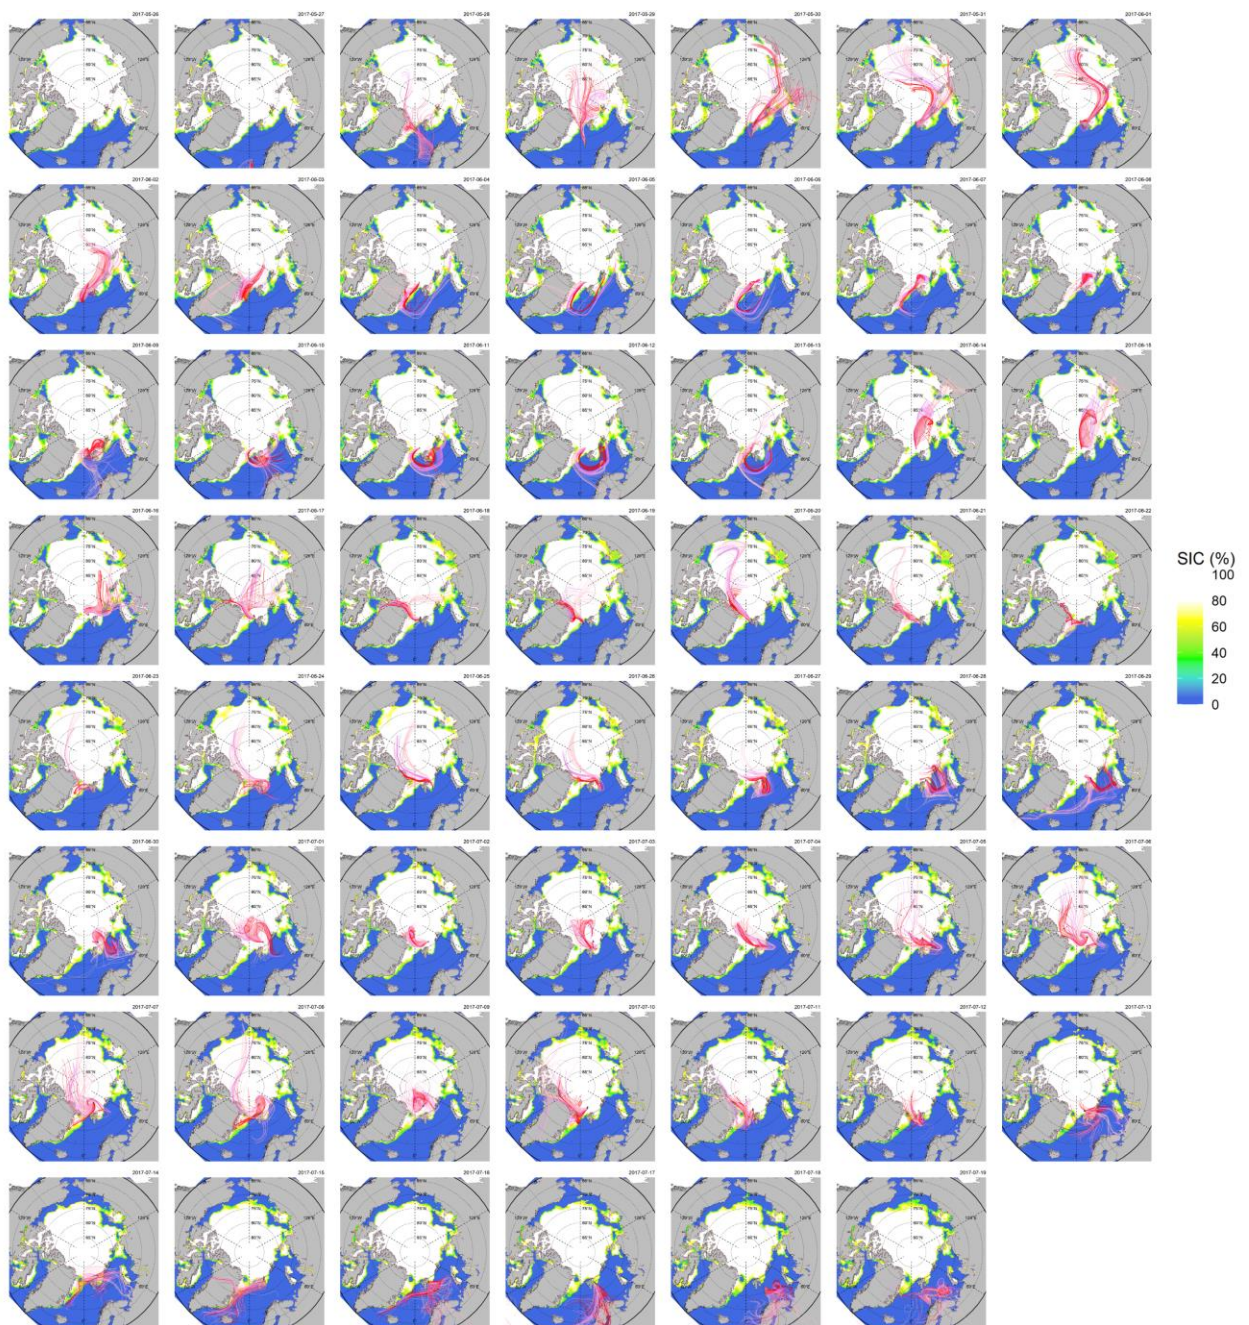

**Figure SI 3.** Daily sea ice maps for PS106 showing sea ice concentrations (SIC) and 120 h back-trajectories on an hourly basis at three arrival heights (red: 50 m, purple: 250 m and pink: 1000 m). A high-resolution animation can be viewed at the following link: <https://doi.org/10.5446/62589>.

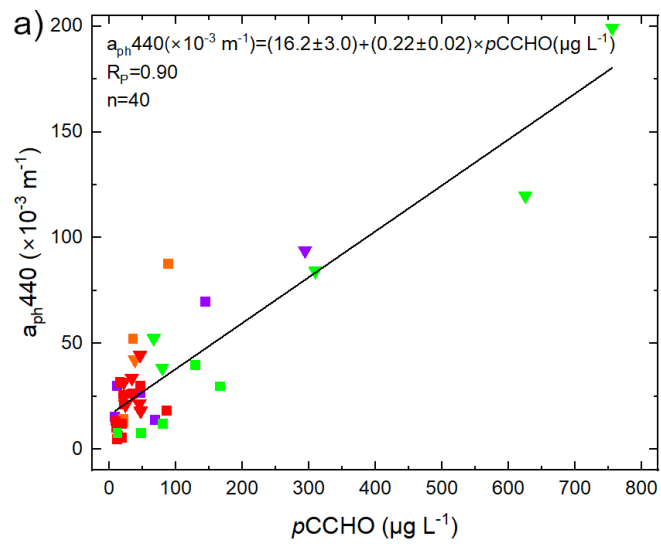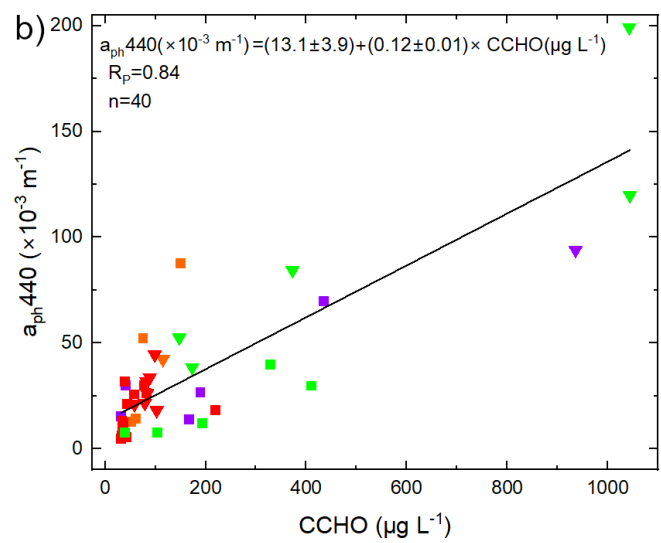

**Figure SI 4.** Correlation plots of  $a_{\text{ph}440}$  derived from PAB spectra against a)  $p\text{CCHO}$  and b)  $\text{CCHO}$ . Triangles: SML, squares: bulk. Green: marginal ice zone (MIZ), purple: melt ponds, orange: ice-free ocean, red: open leads/polynyas in the pack ice.



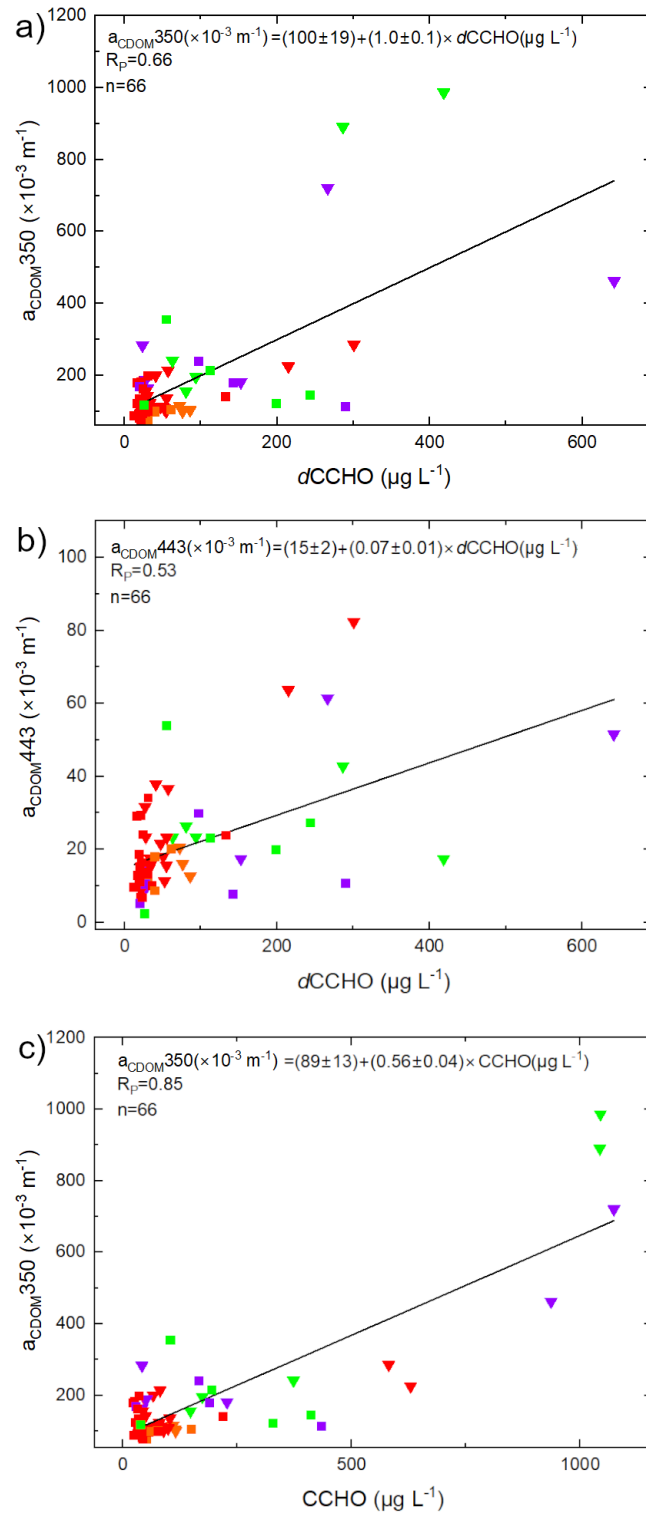

**Figure SI 5.** Correlation plots of a)  $a_{\text{CDOM}350}$  against  $d\text{CCHO}$ , b)  $a_{\text{CDOM}443}$  against  $d\text{CCHO}$  and c)  $a_{\text{CDOM}350}$  against  $\text{CCHO}$ . Triangles: SML, squares: bulk. Green: marginal ice zone (MIZ), purple: melt ponds, orange: ice-free ocean, red: open leads/polynyas in the pack ice.

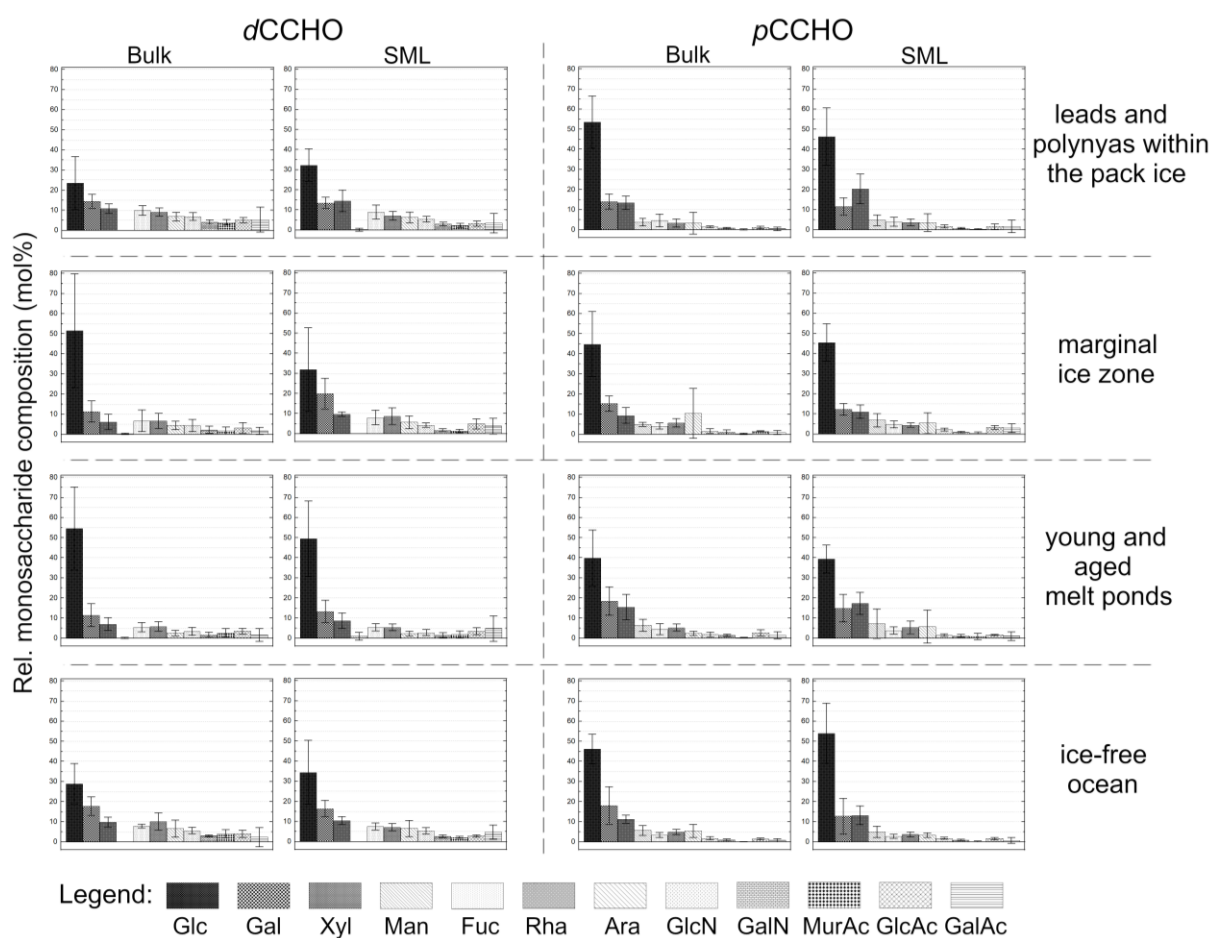

**Figure SI 6.** Relative monosaccharide composition of dissolved (*dCCHO*) and particulate combined carbohydrates (*pCCHO*) after acid hydrolysis in bulk and SML samples from the leads and polynyas within the pack ice, the MIZ, the ice-free ocean and young and aged melt ponds. The bar charts show the averages and standard deviations of the relative contributions.
